# Supplementary material
Source: PubMed Central journal article supplement (PMC4651088)
Supplement: AEM.02585-15_zam999116742so1.pdf [file AEM.02585-15_zam999116742so1.pdf]

Table S1. Primers used to detect transcription levels of *fur* and *fur-like* genes in WT and  $\Delta irrB$ .

| Gene number  | Primer name | Sequence (5' → 3')     |
|--------------|-------------|------------------------|
| MGMSRv2_1721 | IrrAF       | CGTCTACAACACGCTGAACG   |
|              | IrrAR       | TAGAAATGGTGGTGCTCGGC   |
| MGMSRv2_3660 | IrrCF       | CATATCTCGGCCGAGCAA     |
|              | IrrCR       | GAGGTGTTGGTGTCGAAA     |
| MGMSRv2_3137 | FurF        | CCTTGAACGCCACGATTTTCG  |
|              | FurR        | TTCCAACCGATGCCCAACCA   |
| MGMSRv2_0030 | rpoCF       | ATCCGTATTTCCATCGCCTCCC |
|              | rpoCR       | TTGCCGCACAAGCATTCGT    |

Table S2. IrrB-related genes, and primers used to detect transcription levels.

| Gene Number  | Gene Name               | Protein                                                                | Primer name    | Primer sequence (5' → 3')                 |
|--------------|-------------------------|------------------------------------------------------------------------|----------------|-------------------------------------------|
| MGMSRv2_1119 | <i>hemB</i>             | Delta-aminolevulinic acid dehydratase (porphobilinogen synthase)       | hemBF          | AATGACGAGACGGTGGAA                        |
|              |                         |                                                                        | hemBR          | TTCTTGTCGCCTTTCAGC                        |
| MGMSRv2_0427 | <i>bhuA</i>             | Putative TonB-dependent receptor                                       | bhuAF          | TTCGGCGGCTATTCTAT                         |
|              |                         |                                                                        | bhuAR          | TTGATGCGGATGGAGTTG                        |
| MGMSRv2_3313 | <i>hemE</i>             | Uroporphyrinogen decarboxylase                                         | hemEF          | AAACCAAGGTGGATGGCGT                       |
|              |                         |                                                                        | hemER          | TTGCCCAAGGCGTTCAA                         |
| MGMSRv2_3744 | <i>hemA</i>             | Glutamyl-tRNA reductase                                                | hemAF          | ATTCGCAGTGAAACCCGCA                       |
|              |                         |                                                                        | hemAR          | CGACCACATTGGCATTCA                        |
| MGMSRv2_3200 | <i>nifU</i>             | Putative NifU protein (C-terminal fragment)                            | nifUF          | AGACTGAAAACACCCCCA                        |
|              |                         |                                                                        | nifUR          | GAAGAAATCCATGATCGC                        |
| MGMSRv2_1387 | <i>nifS</i>             | Cysteine desulfurase (nitrogenase metallocluster biosynthesis protein) | nifSF          | CGTCGTCGGGCGGGAACC                        |
|              |                         |                                                                        | nifSR          | GATCAGGCACGAGGTGTT                        |
| MGMSRv2_1036 | <i>sufA</i>             | Chaperone involved in Fe-S cluster assembly                            | sufAF          | TCATCCTGACCGAAAGCG                        |
|              |                         |                                                                        | sufAR          | GCAGATCAAG CGAGGTCT                       |
| MGMSRv2_0820 | <i>nsrR</i>             | HTH-type transcriptional regulator                                     | nsrRF          | CGAACTCGTCACCATCAATG                      |
|              |                         |                                                                        | nsrRR          | CCAAGGCGAAATCATCCT                        |
| MGMSRv2_3702 | <i>bfrA</i>             | Bacterioferritin subunit 1                                             | bfrAF<br>bfrAR | GCGTTCTCAATAGGCTGCT<br>ATCTTGGGCACATCGGAA |
| MGMSRv2_3703 | <i>bfrB</i>             | Bacterioferritin, iron storage, and detoxification protein             | bfrBF<br>bfrBR | TGACCGCCATCAATCAGT<br>CGTTCTCAGCATTCCG    |
| MGMSRv2_2122 | <i>unknown function</i> | Conserved membrane protein of unknown function                         | unF<br>unR     | AGGAGCACTGGAAAGGCAT<br>TGCGACAAGGTGAAATGG |

Table S3. Proteins predicted to interact with IrrB according to STRING 9.1 (see Fig. 5B).

| Gene locus   | Gene product                                               |
|--------------|------------------------------------------------------------|
| MGMSRv2_3702 | Bacterioferritin subunit 1                                 |
| MGMSRv2_3703 | Bacterioferritin, iron storage, and detoxification protein |
| MGMSRv2_3313 | Uroporphyrinogen decarboxylase                             |
| MGMSRv2_3112 | Fused DNA polymerase I                                     |
| MGMSRv2_2122 | Conserved membrane protein of unknown function             |
| MGMSRv2_3149 | Member of ferric uptake regulator superfamily (Irr)        |
